# Supplementary material for: JAKinhibs in Psoriatic Disease: Analysis of the Efficacy/Safety Profile in Daily Clinical Practice
Source: Preprints.org preprint supplement (doi:10.20944/preprints202403.0239.v1), 2024-03-05
Supplement: Supplementary file 3 [file supplementary]

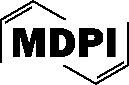
**Patient Consent Form for Articles Containing
Patient Details and/or Images**

This form provides consent for MDPI to publish details and/or images from patients. It must be completed prior to publication.

**Patient details**

Patient name: _ All patients of the present study

If a representative (e.g. parent, guardian, or next of kin) is signing on the patient’s behalf in the event of the patient being underage, deceased or deemed unfit to give legal consent:

Name of patient representative: ____Ricardo Ruiz Villaverde______________________________

Relationship of representative to patient: __

Consultant Dermatologist, responsible of the treatment ________________________________

By signing this form, I confirm that I have the authority to represent the patient and provide authorization on their behalf.

**Article details**

Article title: ___ **JAKinhibs in psoriatic disease: analysis of the efficacy/safety profile in daily clinical practice** _______________________________

Journal: ____Diagnostics______________________________

1. Authors: ______ Franceso Bizzarri. Servicio de Reumatologia. Hospital Universitario San Cecilio, Granada, Spain. Instituto Biosanitario de Granada, Ibs
2. Ricardo Ruiz-Villaverde. Servicio de Dermatología. Hospital Universitario San Cecilio, Granada, Spain. Instituto Biosanitario de Granada, Ibs
3. Pilar Morales- Garrido. Servicio de Reumatologia. . Hospital Universitario San Cecilio, Granada, Spain. Instituto Biosanitario de Granada, Ibs
4. Jose Carlos Ruiz-Carrascosa. Servicio de Dermatología. Hospital Universitario San Cecilio, Granada, Spain. Instituto Biosanitario de Granada, Ibs
5. Marta Cebolla-Verdugo. Servicio de Dermatología. Hospital Universitario San Cecilio, Granada, Spain. Instituto Biosanitario de Granada, Ibs
6. Alvaro Prados-Carmona, Servicio de Dermatología. Hospital Universitario San Cecilio, Granada, Spain. Instituto Biosanitario de Granada, Ibs
7. Mar Rodriguez-Troncoso. Servicio de Dermatología. Hospital Universitario San Cecilio, Granada, Spain. Instituto Biosanitario de Granada, Ibs
8. Enrique Raya-Alvarez. Servicio de Reumatologia. Hospital Universitario San Cecilio, Granada, Spain. Instituto Biosanitario de Granada, Ibs
9. ____________________________

**Declaration by patient or their representative**

I, the patient named above or the patient’s representative, have read the abovenamed article in full (including text, figures, and supplementary material) and agree to its publication. I am fully aware of the implications of publication and accept any associated risk. In particular, I understand that, despite anonymization, it is possible that I (or the patient) may be identified based on the details or images contained in the article. While the authors and the publisher will make efforts to minimize this risk, confidentiality cannot be guaranteed.

I understand that the paper will be published online in open access format (using a creative commons CC BY 4.0 license, http://creativecommons.org/licenses/by/4.0), meaning that it can be downloaded, copied and reused without limitation. This include any figures, tables, and supplementary data. The primary audience for the published paper will be healthcare professionals, research academics and students from across the globe.

The final published version may differ from the one submitted to the journal due to minor revisions, changes to style, and reformatting. Publication in the journal mentioned above is not guaranteed and will take place at the discretion of the publisher, and with permission of the Editor-in-Chief (or a qualified Editorial Board member) after a peer review process.

Signing this form does not remove any of my/the patient’s statutory rights to privacy. I understand that I may revoke consent at any point prior to publication, but after publication my consent can no longer be withdrawn.

I understand that I/the patient will receive no financial benefit or compensation from publication of the article.

Patient and/or representative signature(s):

___________________________________

Place, date:

_____Granada, 3rd March 2024______________________________
